# See and Hear What the Field is Discussing

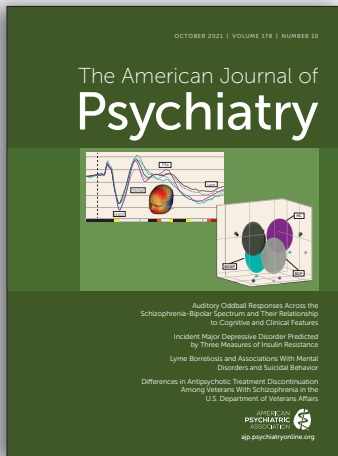

*The American Journal of Psychiatry* is committed to keeping the field of psychiatry vibrant and relevant by publishing the latest advances in the diagnosis and treatment of mental illness. Here are the most discussed articles that AJP published in early 2022 according to Altmetric, which monitors the online mentions and shares of research through daily tracking of 2,000 mainstream media outlets, Wikipedia, citations, social media, and more than 9,000 academic and nonacademic blogs.

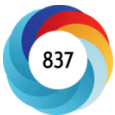

## Stanford Neuromodulation Therapy (SNT): A Double-Blind Randomized Controlled Trial

February 2022 issue

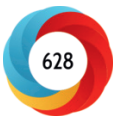

## Longitudinal Changes in Structural Connectivity in Young People at High Genetic Risk for Bipolar Disorder

May 2022 issue

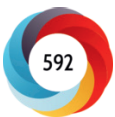

## Adjunctive Ketamine With Relapse Prevention-Based Psychological Therapy in the Treatment of Alcohol Use Disorder

February 2022 issue

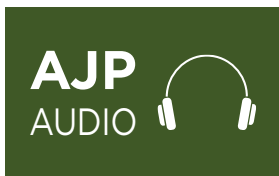

## Dive Deeper With AJP Audio

Each episode of the **AJP Audio** podcast brings you an in-depth look at one of the articles featured in that month's issue of *The American Journal of Psychiatry*. Wide-ranging interviews with article authors cover the background, rationale, main findings, and future implications of the research.

- **April 2022: Effects of County-Level Opioid Dispensing Rates on Individual-Level Patterns of Prescription Opioid and Heroin Consumption**

Dr. Brian Kelly discusses a study that found recent efforts to curb opioid prescriptions appear to have had an effect on reducing prescription opioid misuse and dependence, with no evidence that these efforts affected odds of heroin use, frequency of heroin use, or heroin dependence.

- **March 2022: Genetics and Brain Transcriptomics of Completed Suicide**

Dr. Giovanna Punzi and Dr. Daniel Weinberger discuss differences in the brains of those who die by violent versus less violent means of suicide.

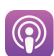

Apple Podcasts

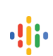

Google Podcasts

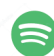

Spotify

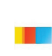

STITCHER

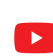

YouTube

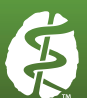

PERMANENTE MEDICINE®

Physician led. Evidence based.  
Culturally driven. Technology enabled.

Interested in fulfilling the promise of medicine?

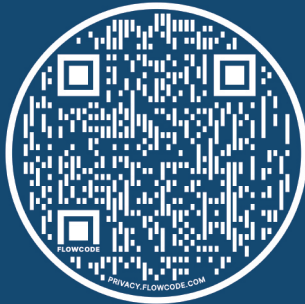

Scan here to take  
the next step in your  
Psychiatry career.

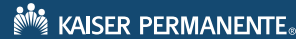

permanente.org  
We are an EOE/AA/M/F/D/V Employer

# APA Publishing **Audio Books** Listen anytime, anywhere

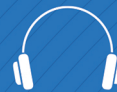

Purchase and listen at [appi.org](http://appi.org)

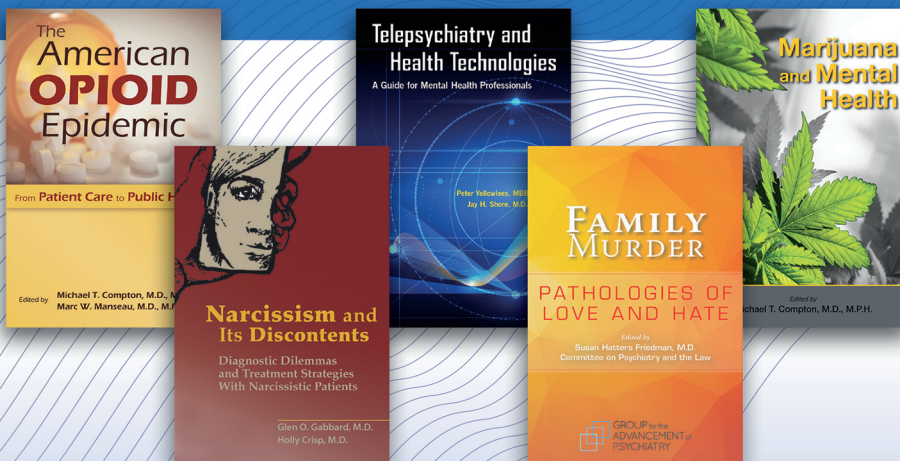

Also available at: Google Podcasts, Apple Podcasts,  
Spotify, Stitcher, and YouTube

AMERICAN  
**PSYCHIATRIC**  
ASSOCIATION  
**PUBLISHING**   
[www.appi.org](http://www.appi.org)  
Email: [appi@psych.org](mailto:appi@psych.org)  
Toll-Free: 1-800-368-5777

# We've got you covered

## APA Endorsed Professional Liability Insurance

The use of telepsychiatry is increasing and projected to expand. With the significant increase in cyber attacks against individuals and businesses, psychiatrists who maintain confidential and sensitive data are prime targets, regardless of having a private practice or working for a company.

We provide comprehensive professional liability coverage, which includes telebehavioral health coverage. What's more, our insureds have the opportunity to purchase a cyber protection endorsement allowing for peace of mind and the ability to concentrate on what psychiatrists do best, helping others.

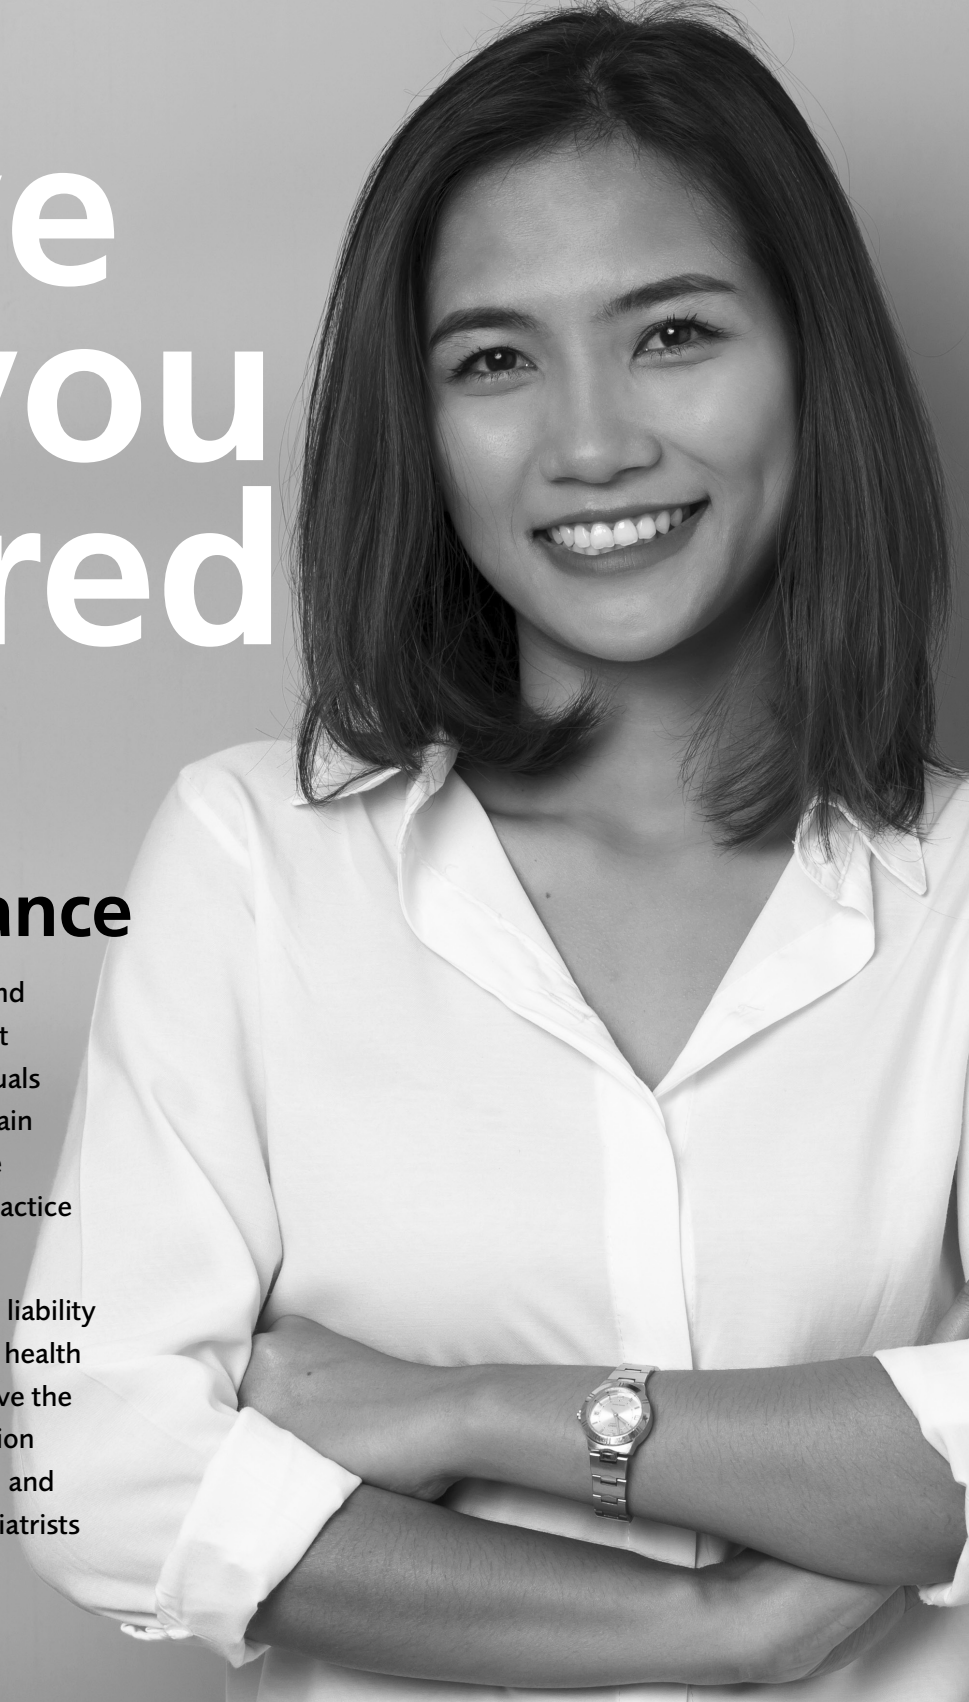

Visit us at [apamalpractice.com](http://apamalpractice.com) or call (800) 421-6694 Ext. 2318 to learn more.

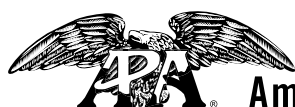

**American Professional Agency**

LEADERS IN PSYCHIATRIC MEDICAL LIABILITY INSURANCE

ENDORSED BY

AMERICAN  
PSYCHIATRIC  
ASSOCIATION

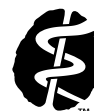

Source: http://ajp.psychiatryonline.org/doi/suppl/10.1176/ajp.2022.179.issue-6/suppl_file/back.pdf
