JUNE 2022 | VOLUME 179 | NUMBER 6

# The American Journal of Psychiatry

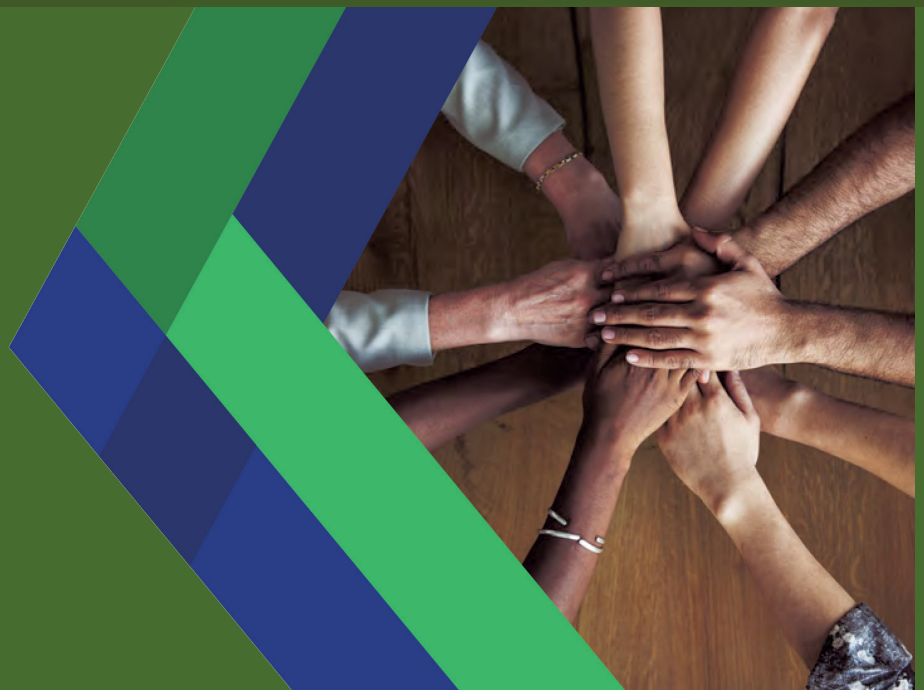

Mental Health Disparities Research: An Introduction  
to New Directions

A New Agenda for Optimizing Investments in Community  
Mental Health and Reducing Disparities

Structural Racism and Suicide Prevention for  
Ethnographically Minoritized Youth

The Intergenerational Impact of Structural Racism  
and Cumulative Trauma on Depression

AMERICAN  
**PSYCHIATRIC**  
ASSOCIATION 

[ajp.psychiatryonline.org](http://ajp.psychiatryonline.org)
